# Supplementary material for: Molecular Insights into SARS-CoV2-Induced Alterations of the Gut/Brain Axis
Source: Int J Mol Sci. 2021 Sep 28;22(19):10440. doi: 10.3390/ijms221910440 (PMC8508788; doi:10.3390/ijms221910440)

To explore in human small intestine enterocytes the steady state mRNA expression levels of genes of interest, we extracted results gathered in the genomics database “Human Protein Atlas” (HPA) (<https://www.proteinatlas.org/>) [82]. More specifically, we queried the HPA consensus dataset which was obtained by compiling and normalizing the currently 3 largest mRNA expression atlases obtained from the analysis of normal human tissues and cells: the HPA dataset (<https://www.proteinatlas.org/>), the FANTOM5 dataset (<https://fantom.gsc.riken.jp/5/>) [83] and the GTEx dataset (<https://gtexportal.org/home/>) [84]. The bioinformatics method used to combine and normalize data from these 3 distinct sources is described in details on the HPA website (<https://www.proteinatlas.org/>). In brief, for each of the 3 transcriptomics datasets (HPA, GTEx and FANTOM5), the average Transcripts Per Kilobase Million (TPM) value of all individual samples for each human tissue or human cell type was extracted. All TPM values of all the samples within each data source were normalized using the trimmed mean of M values (TMM) method, followed by Pareto scaling of each gene within each data source. Tissue data from the three transcriptomics datasets were subsequently integrated using batch correction through the “removeBatchEffect” function of R package Limma, using the data source as a batch parameter. The resulting transcript expression values, denoted Normalized eXpression (NX), were then calculated for each gene in every sample.

Below are shown the Normalized eXpression values (NX) reported in the HPA genomics atlas in 61 human tissues for the genes of interest we selected. Genes exhibiting the highest rank of expression in the small intestine are first shown.

## ACE2

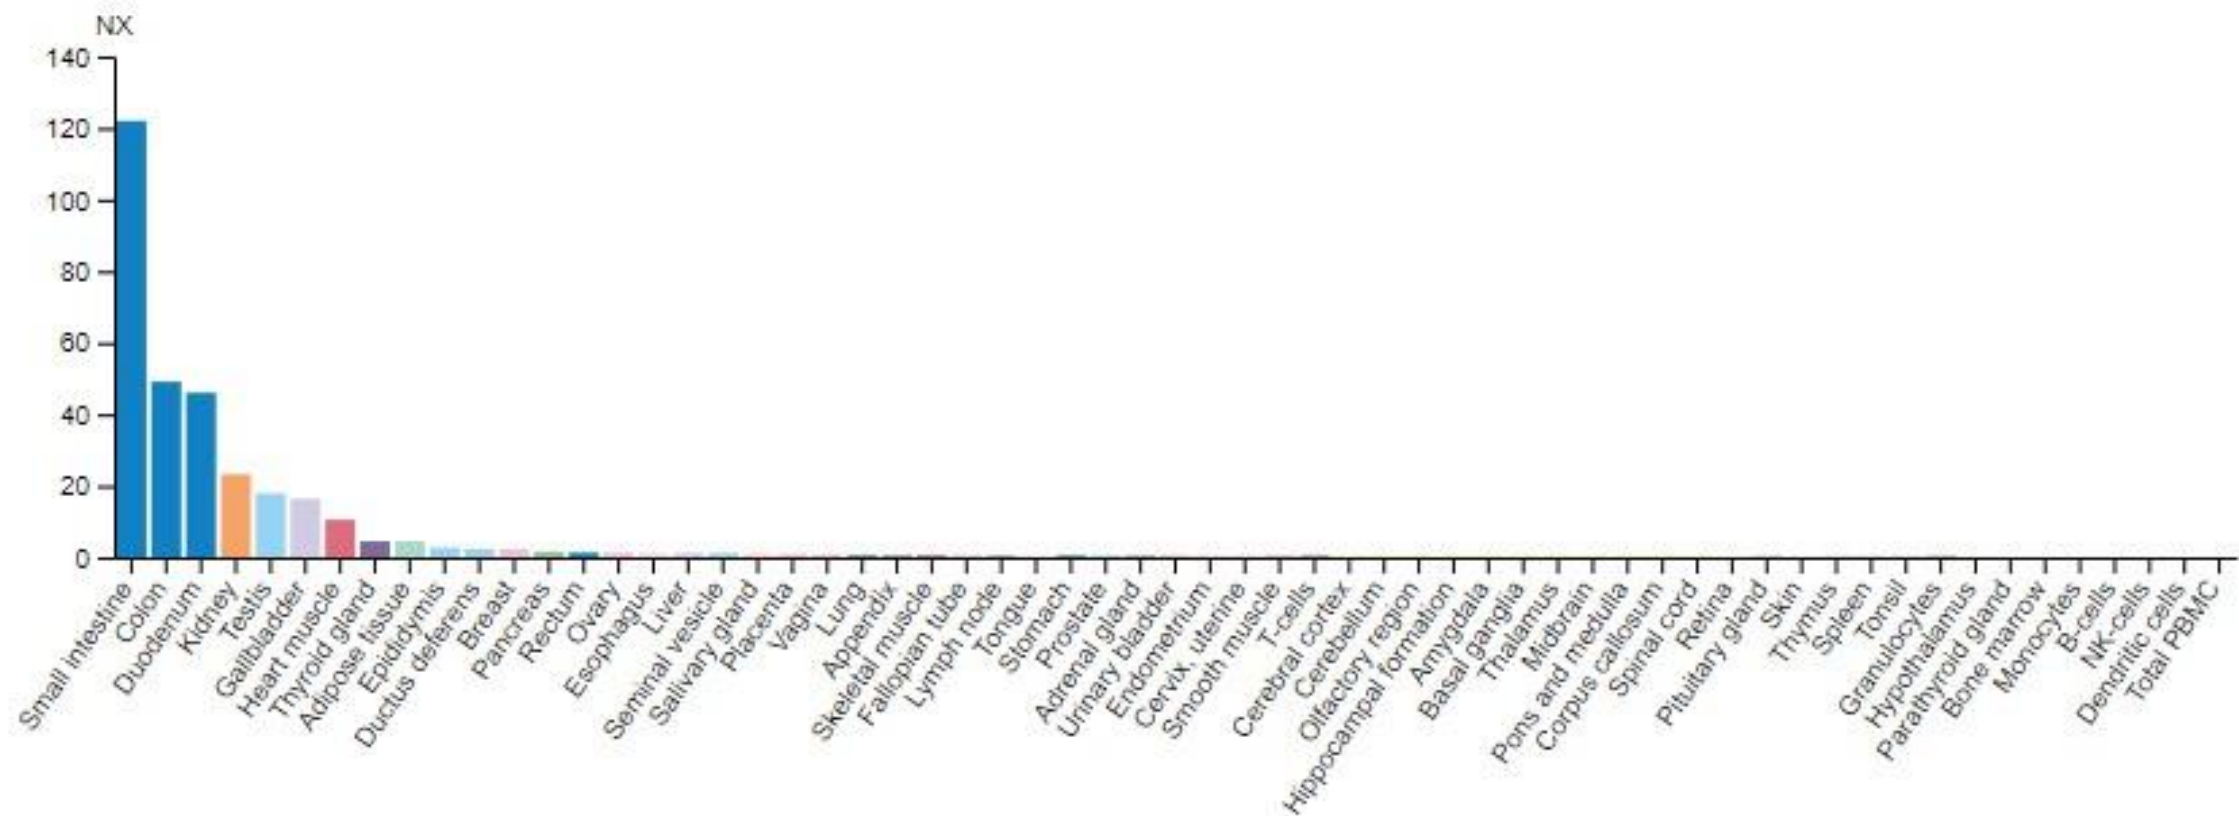

**DDC**

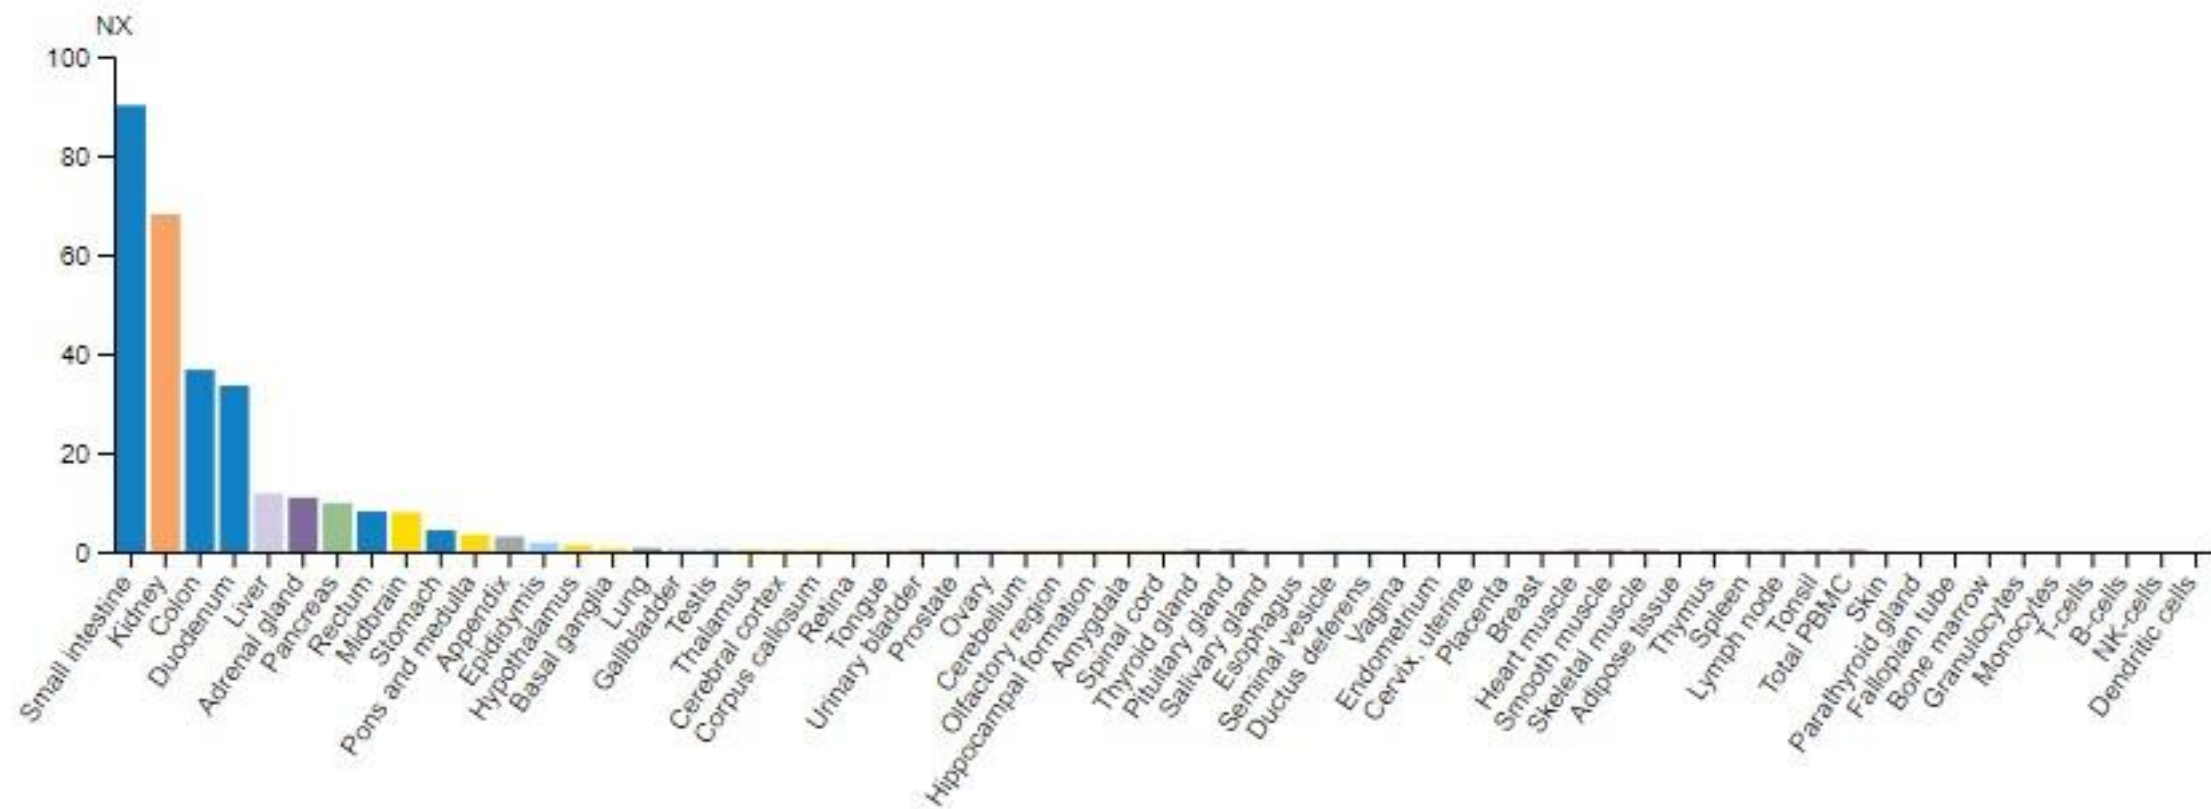

## MAOA

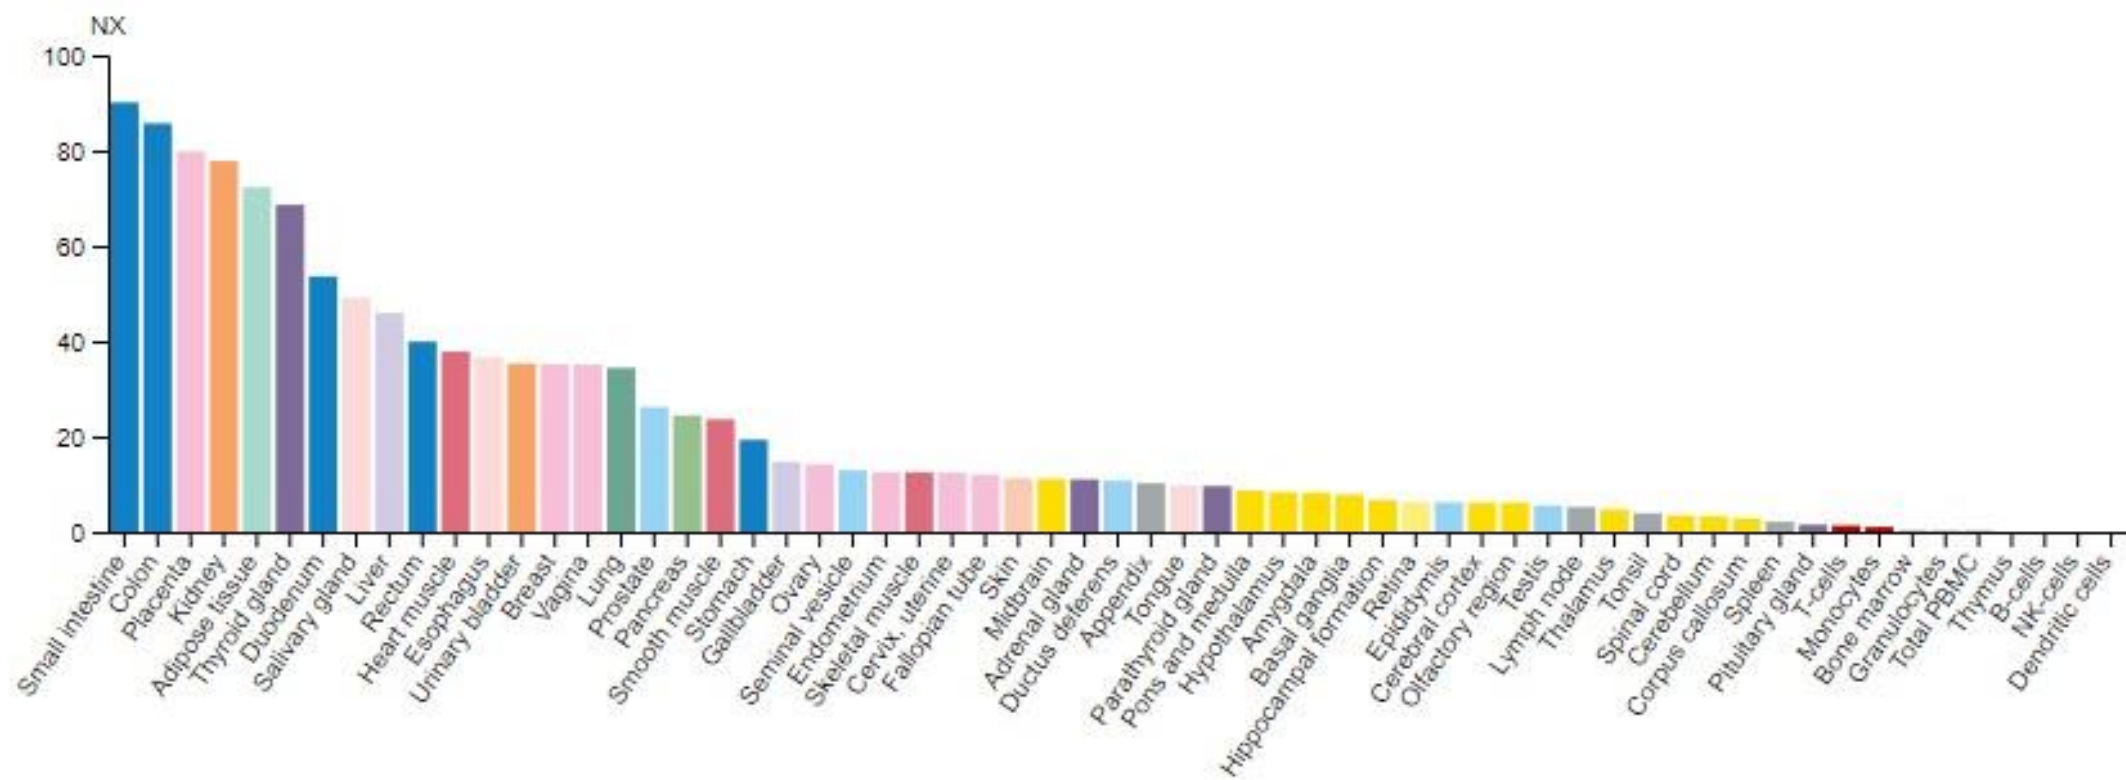

## SLC6A19

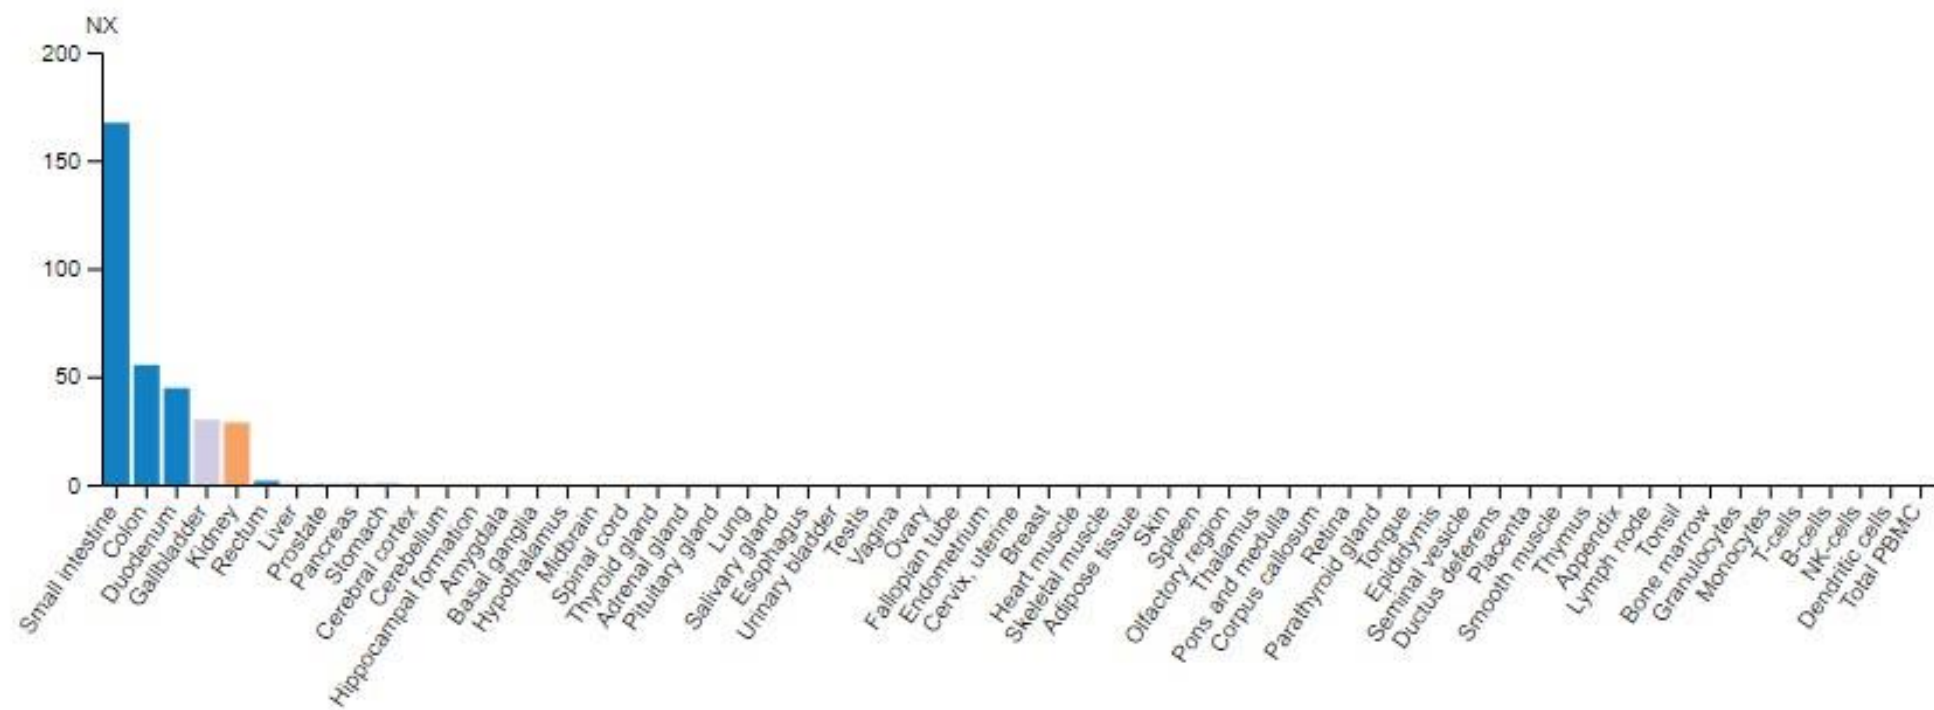

## SUT1A2

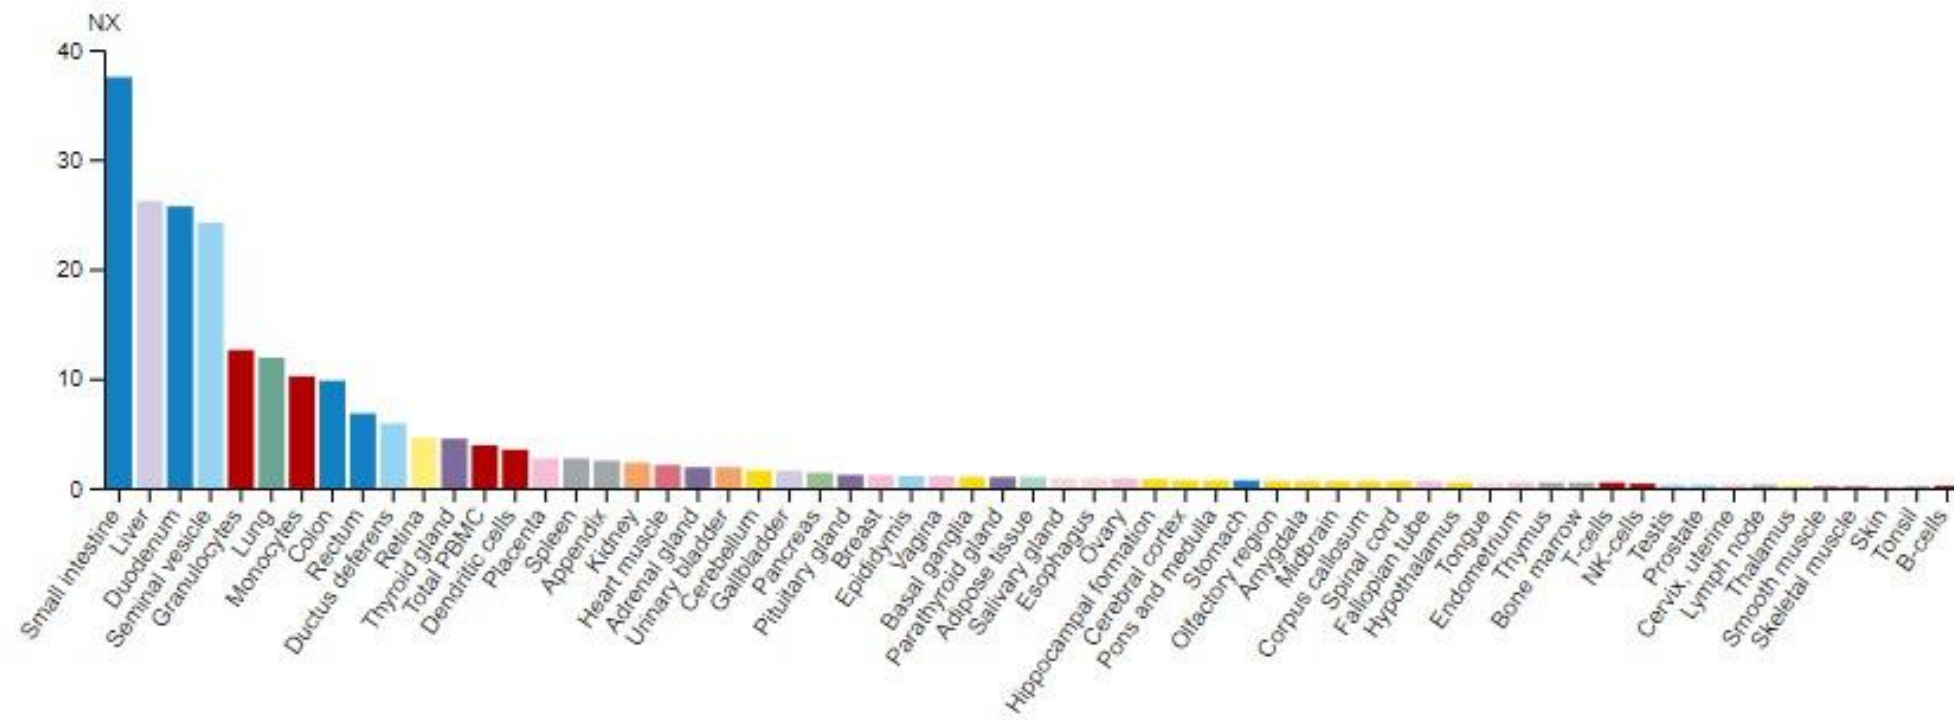

## CYP2D6

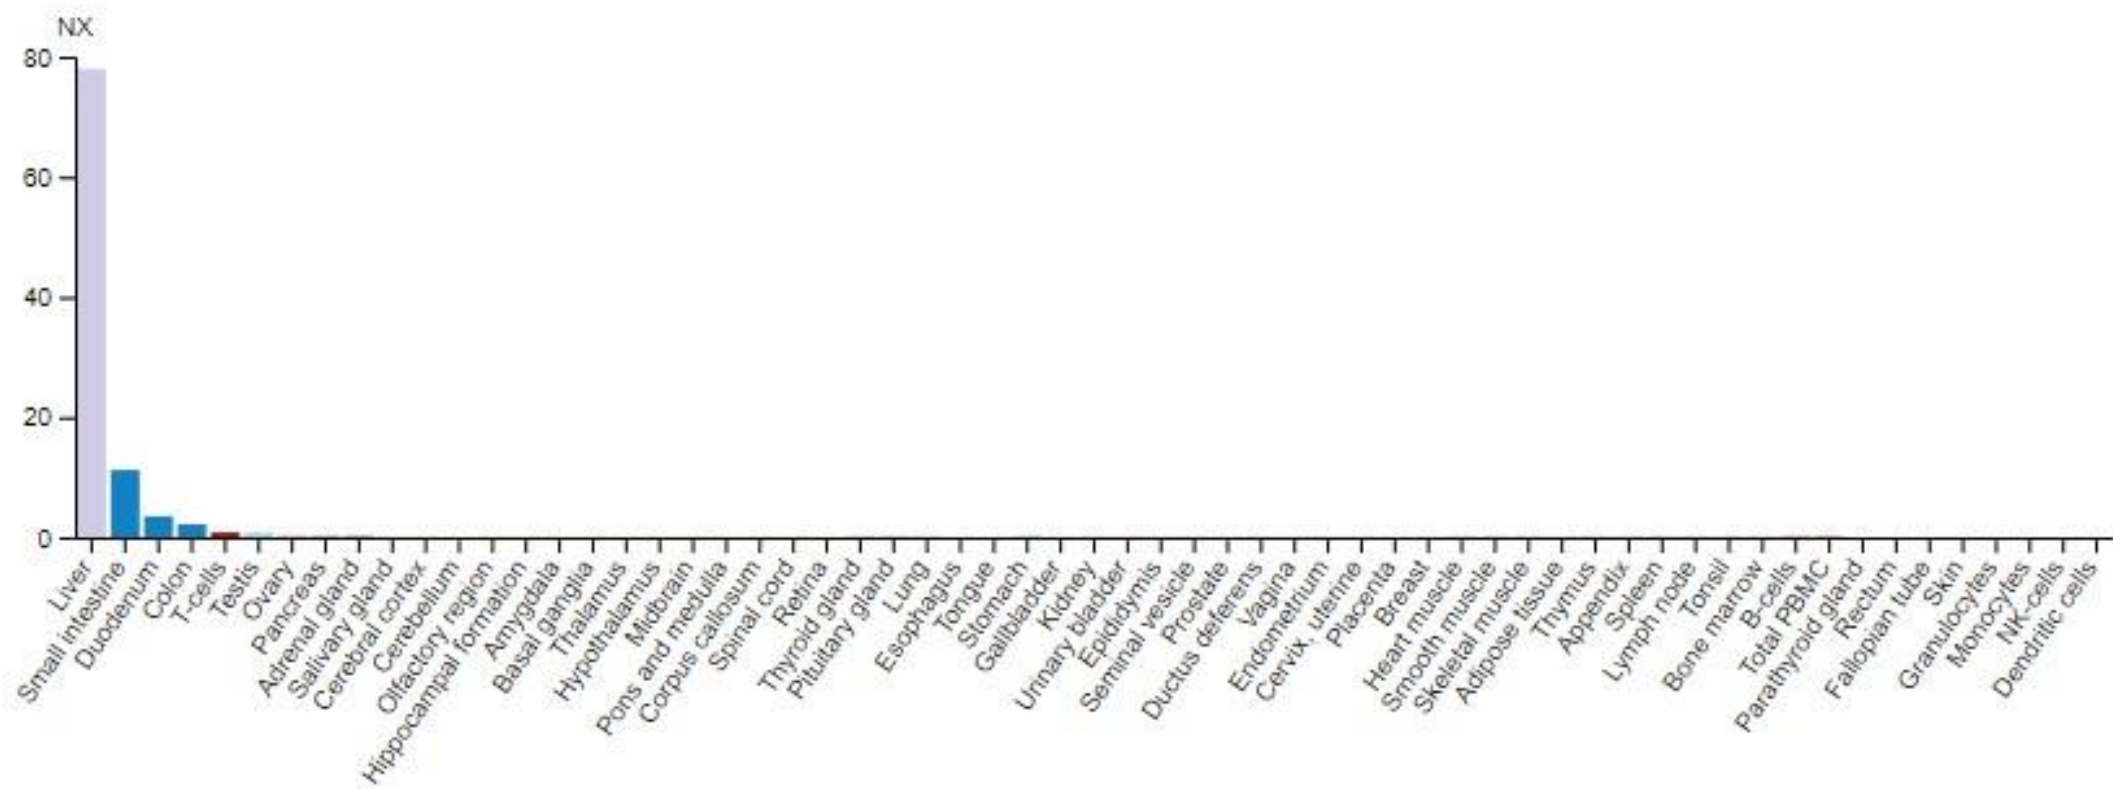

## SLC3A1

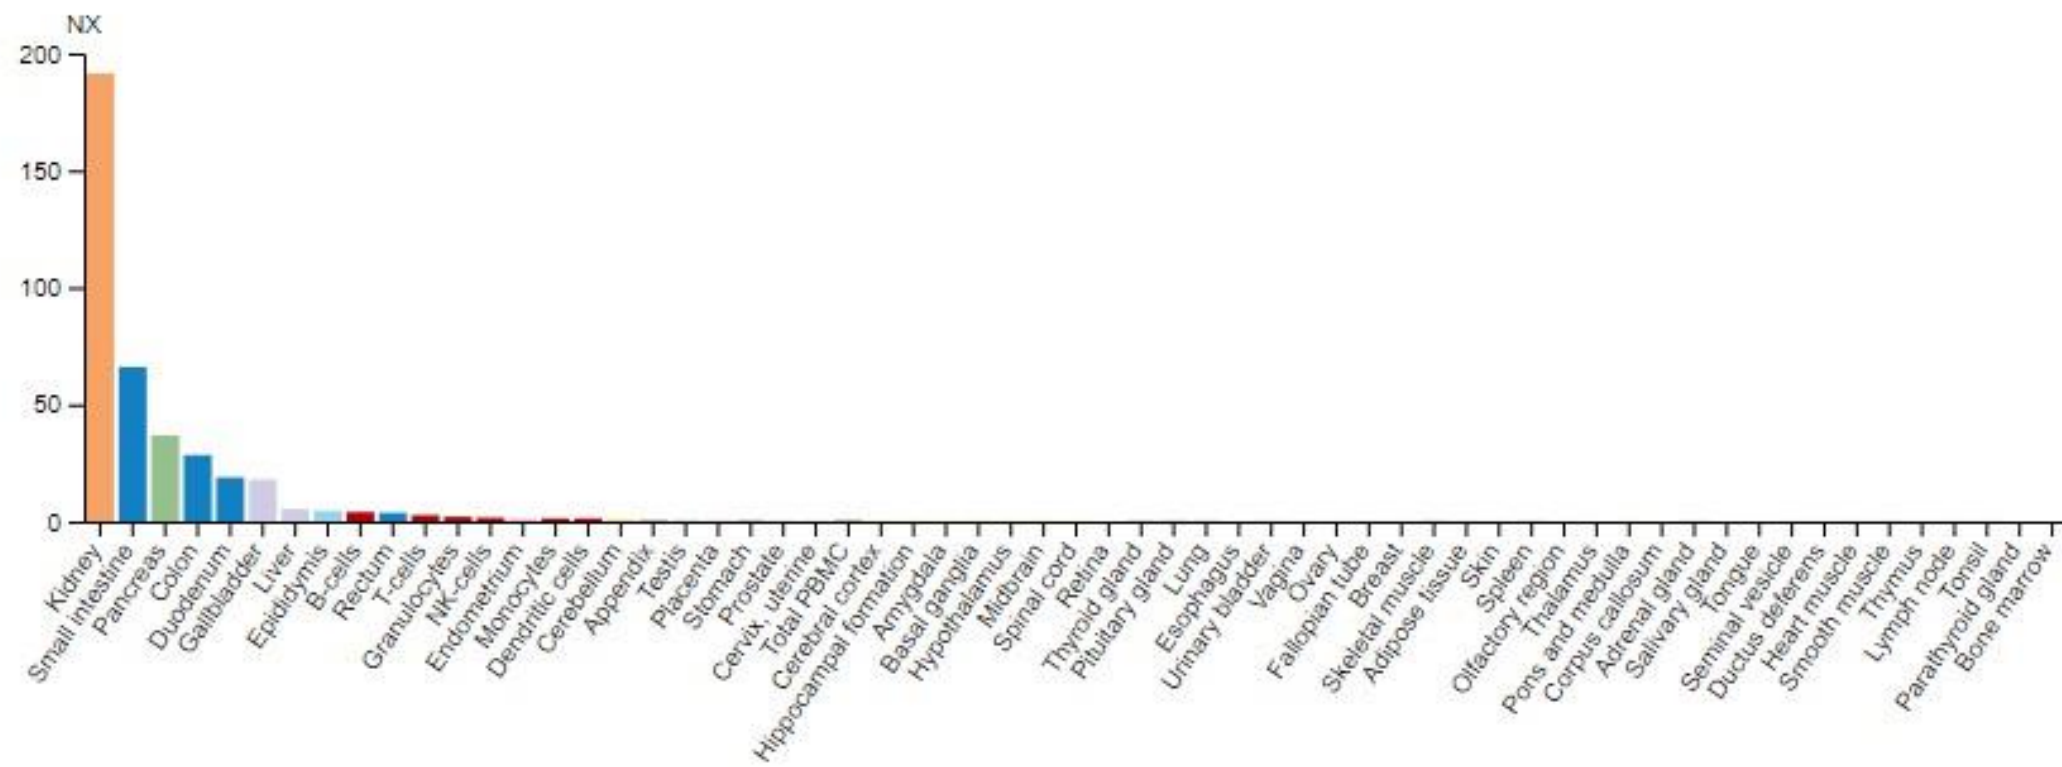

## SULT1A3

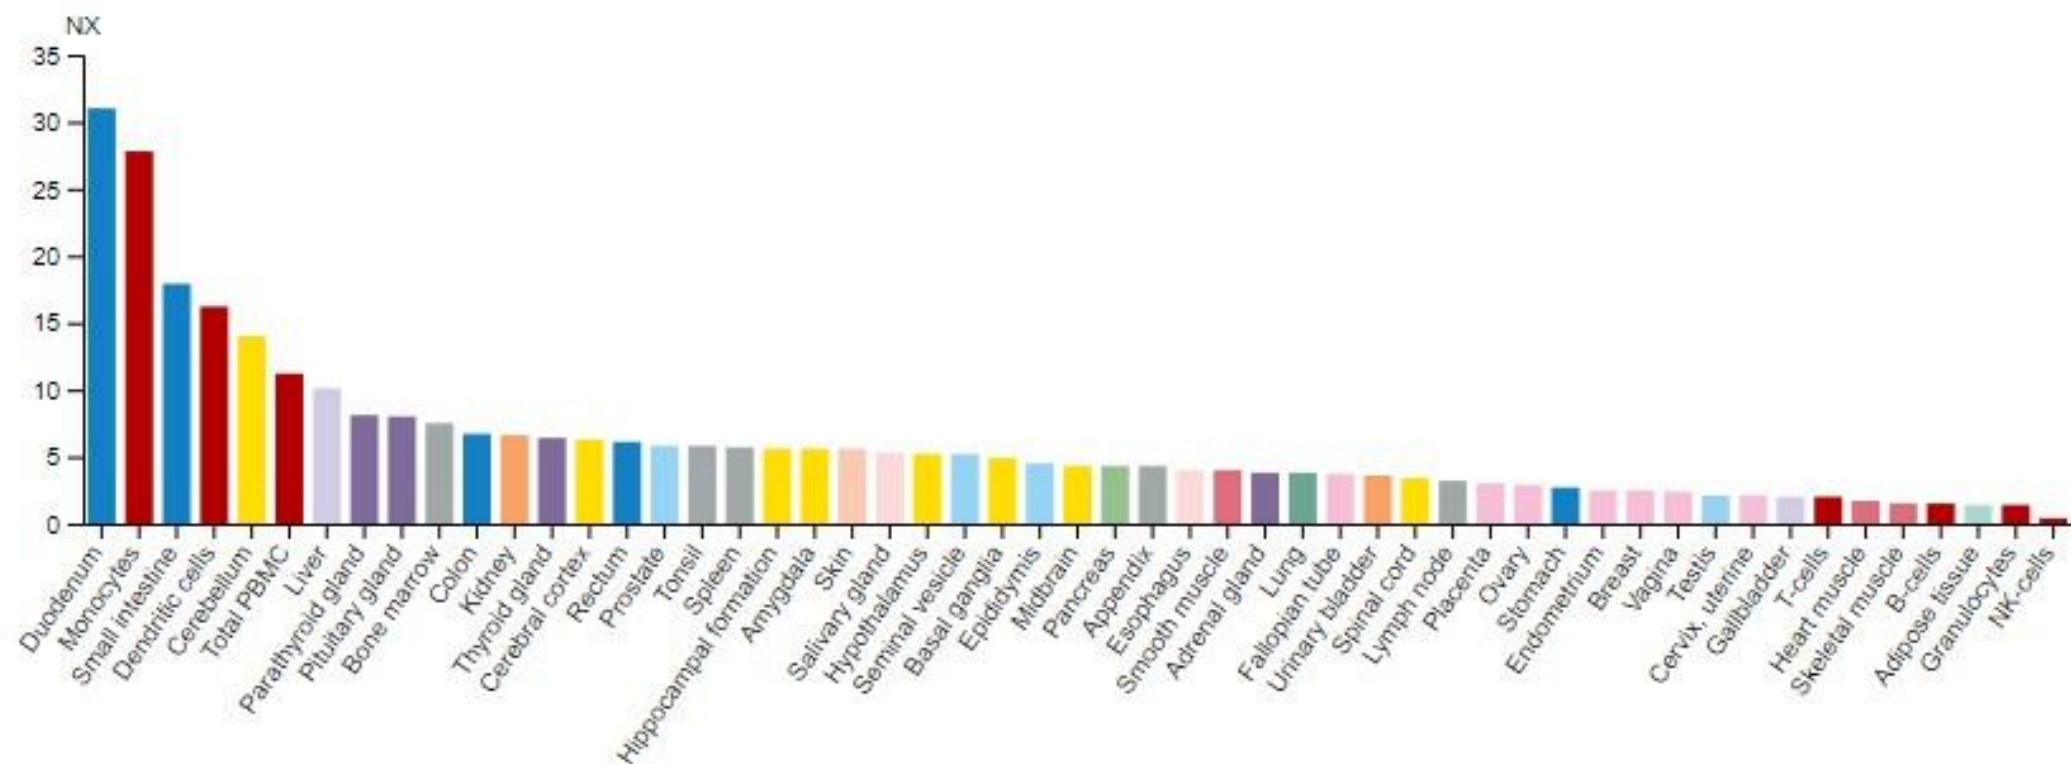

## SUT1A1

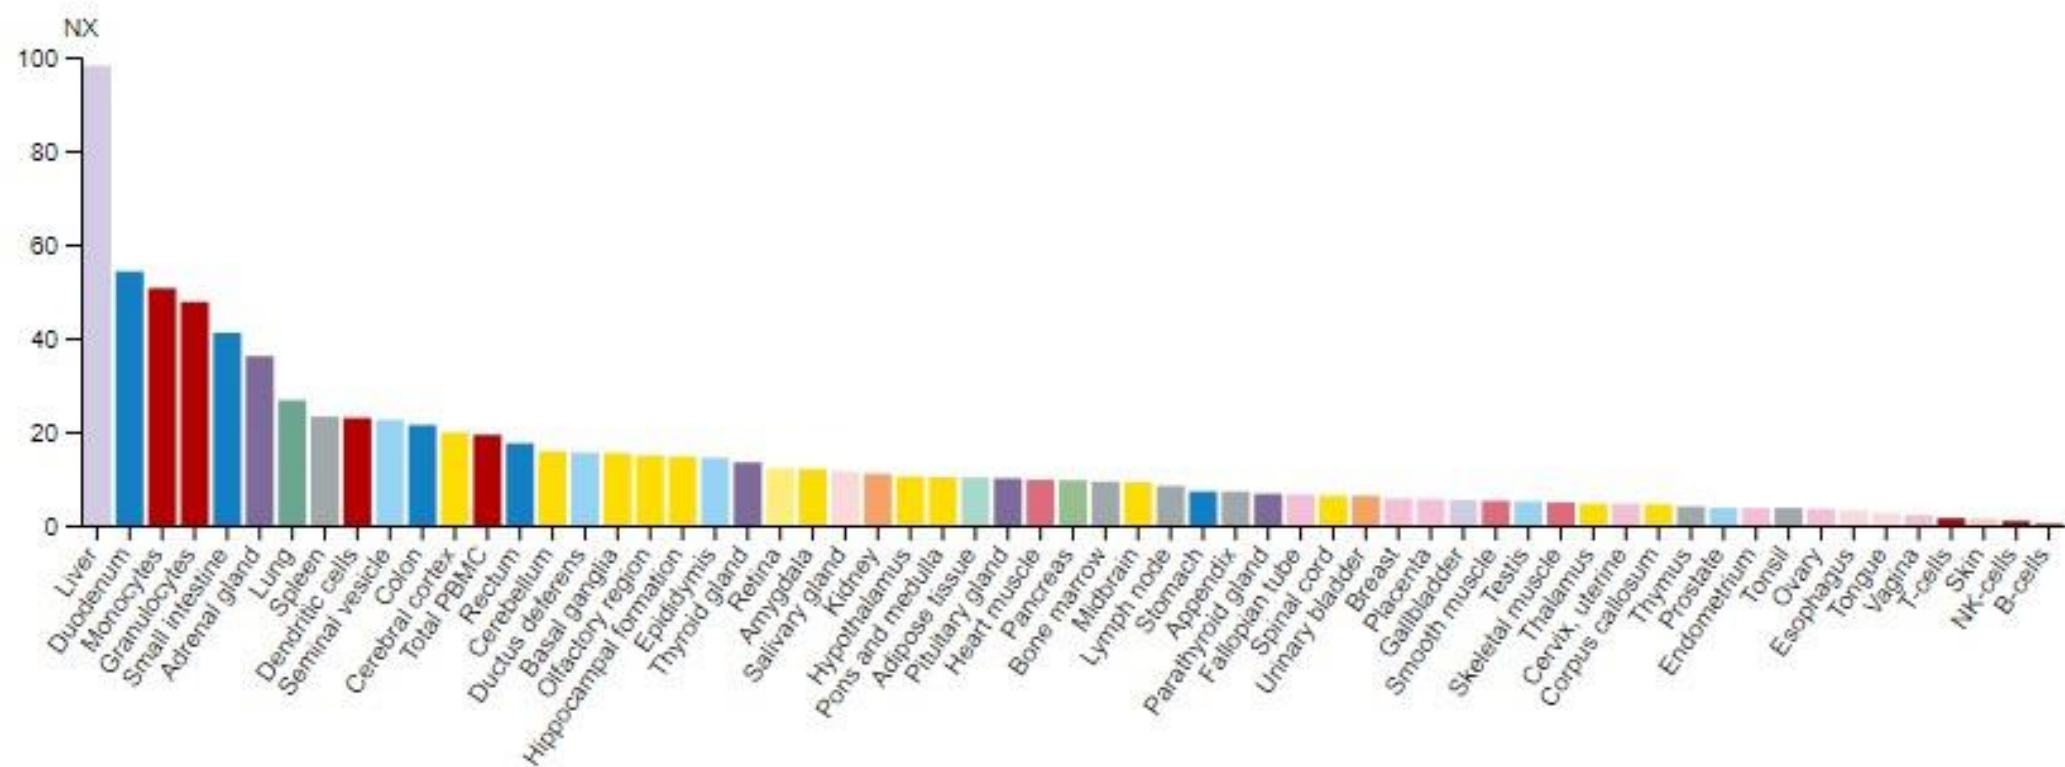

## SLC16A10

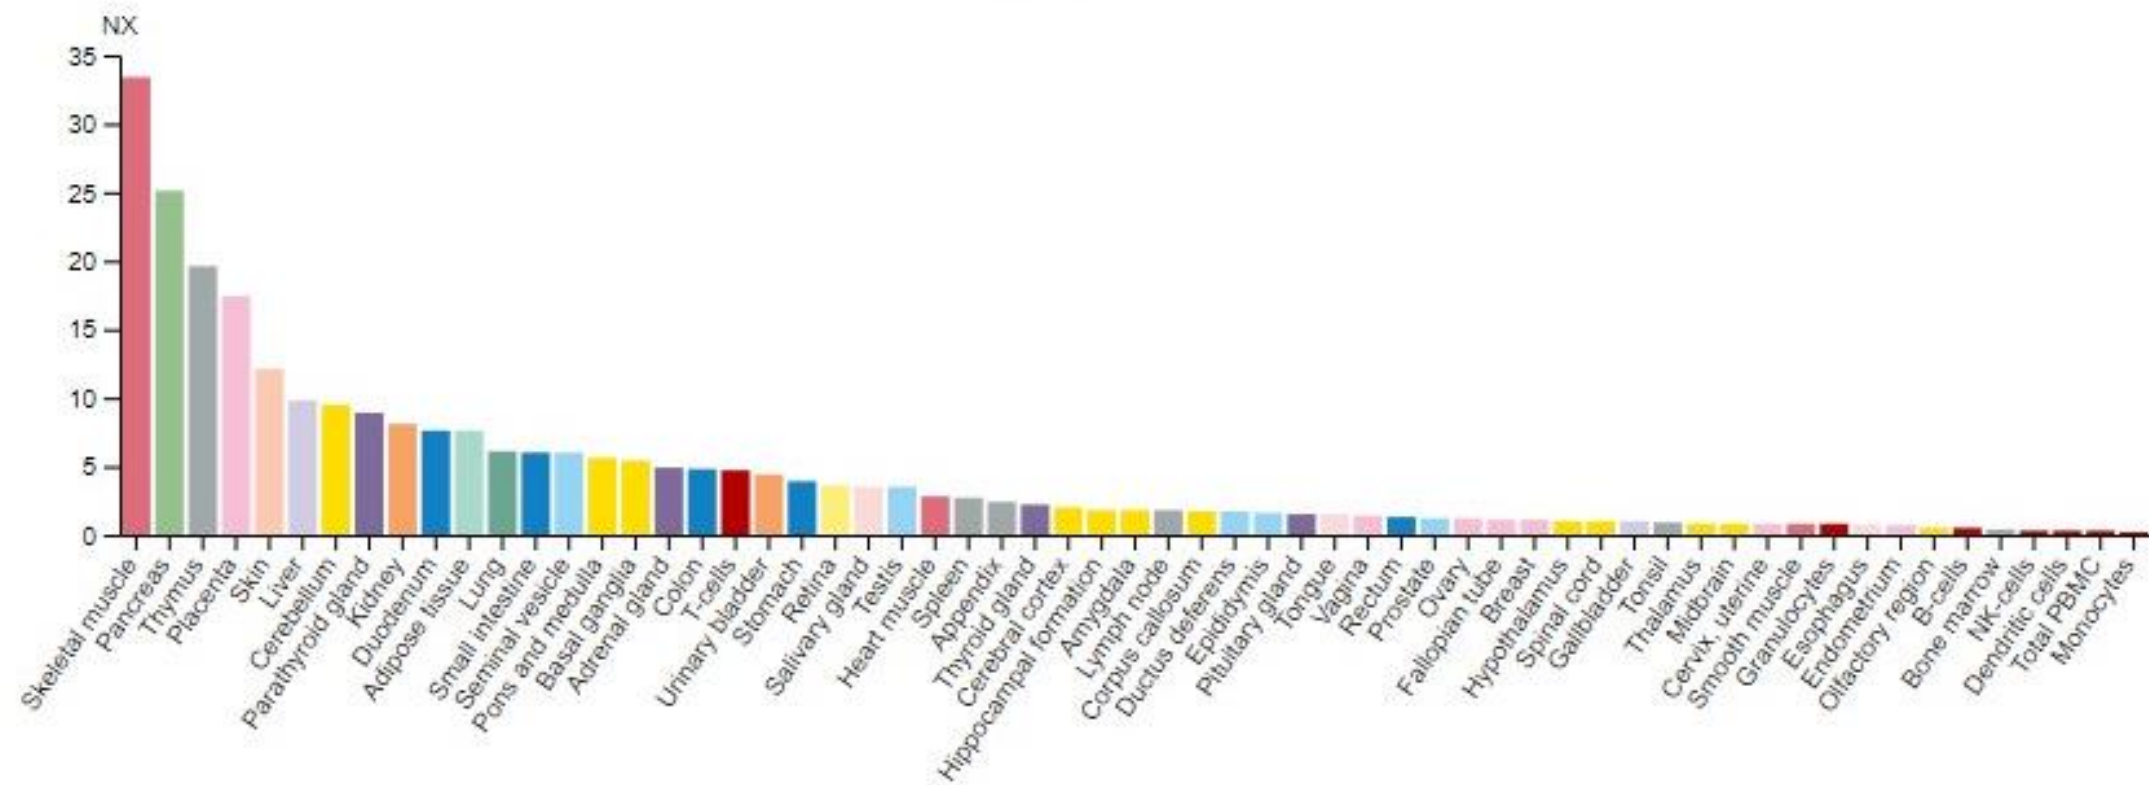

## MAOB

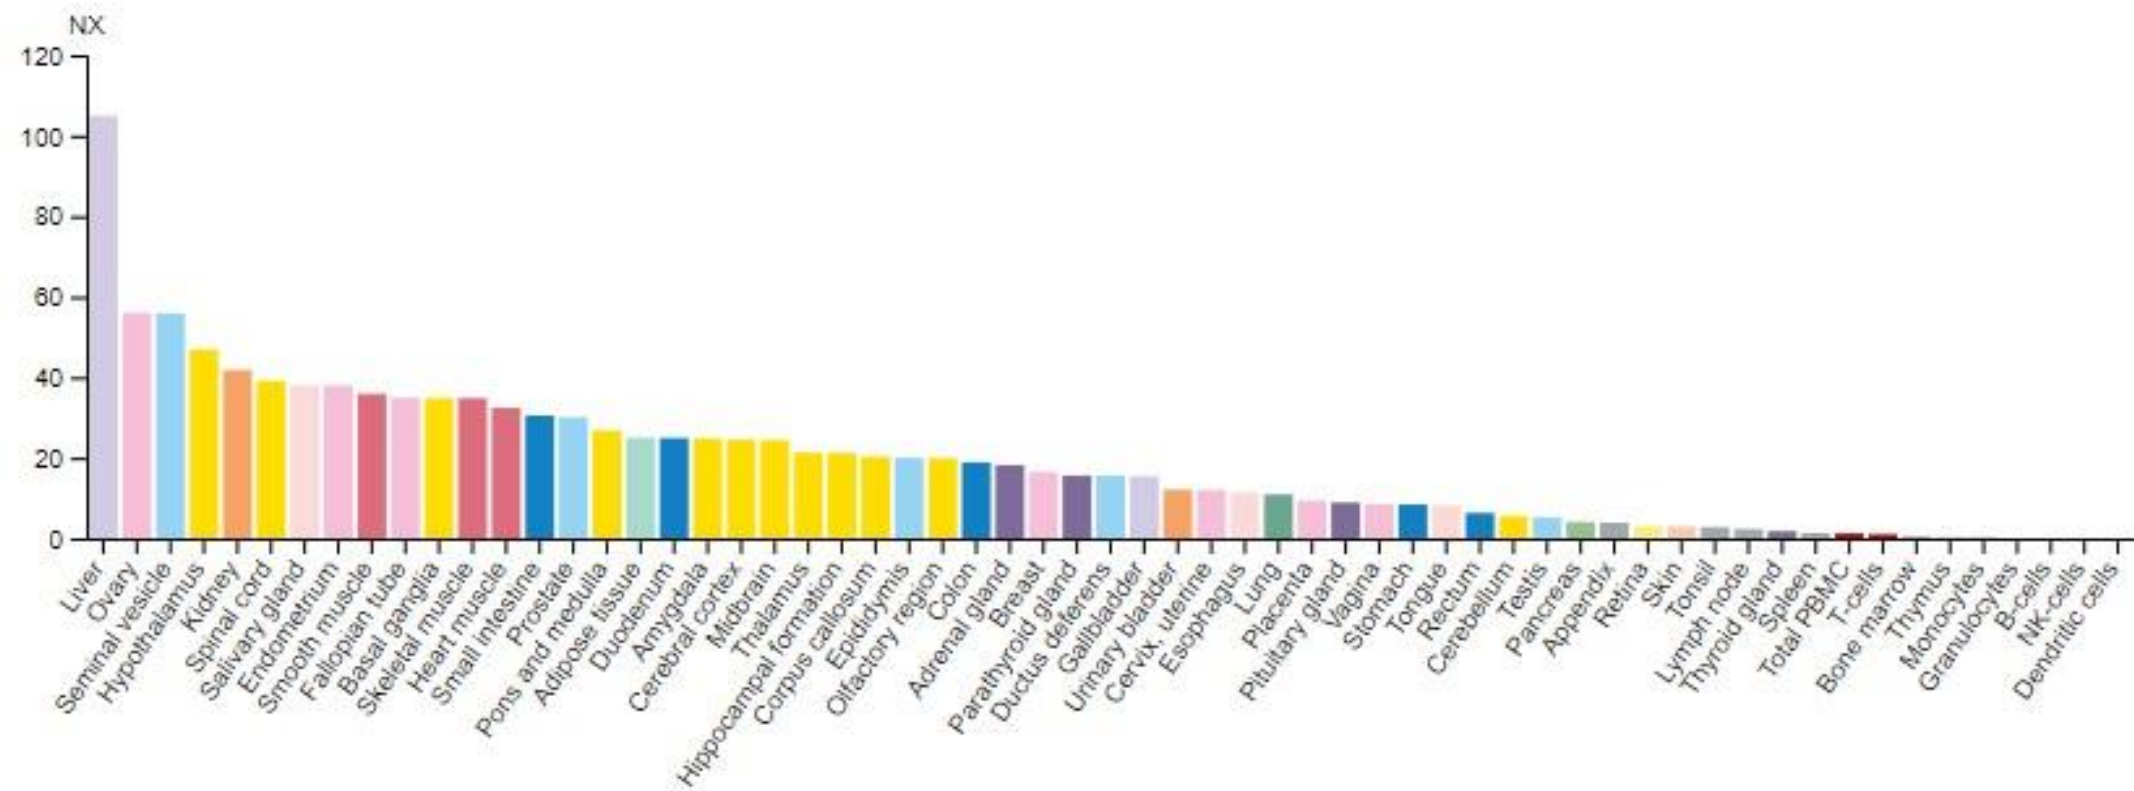

## SLC3A2

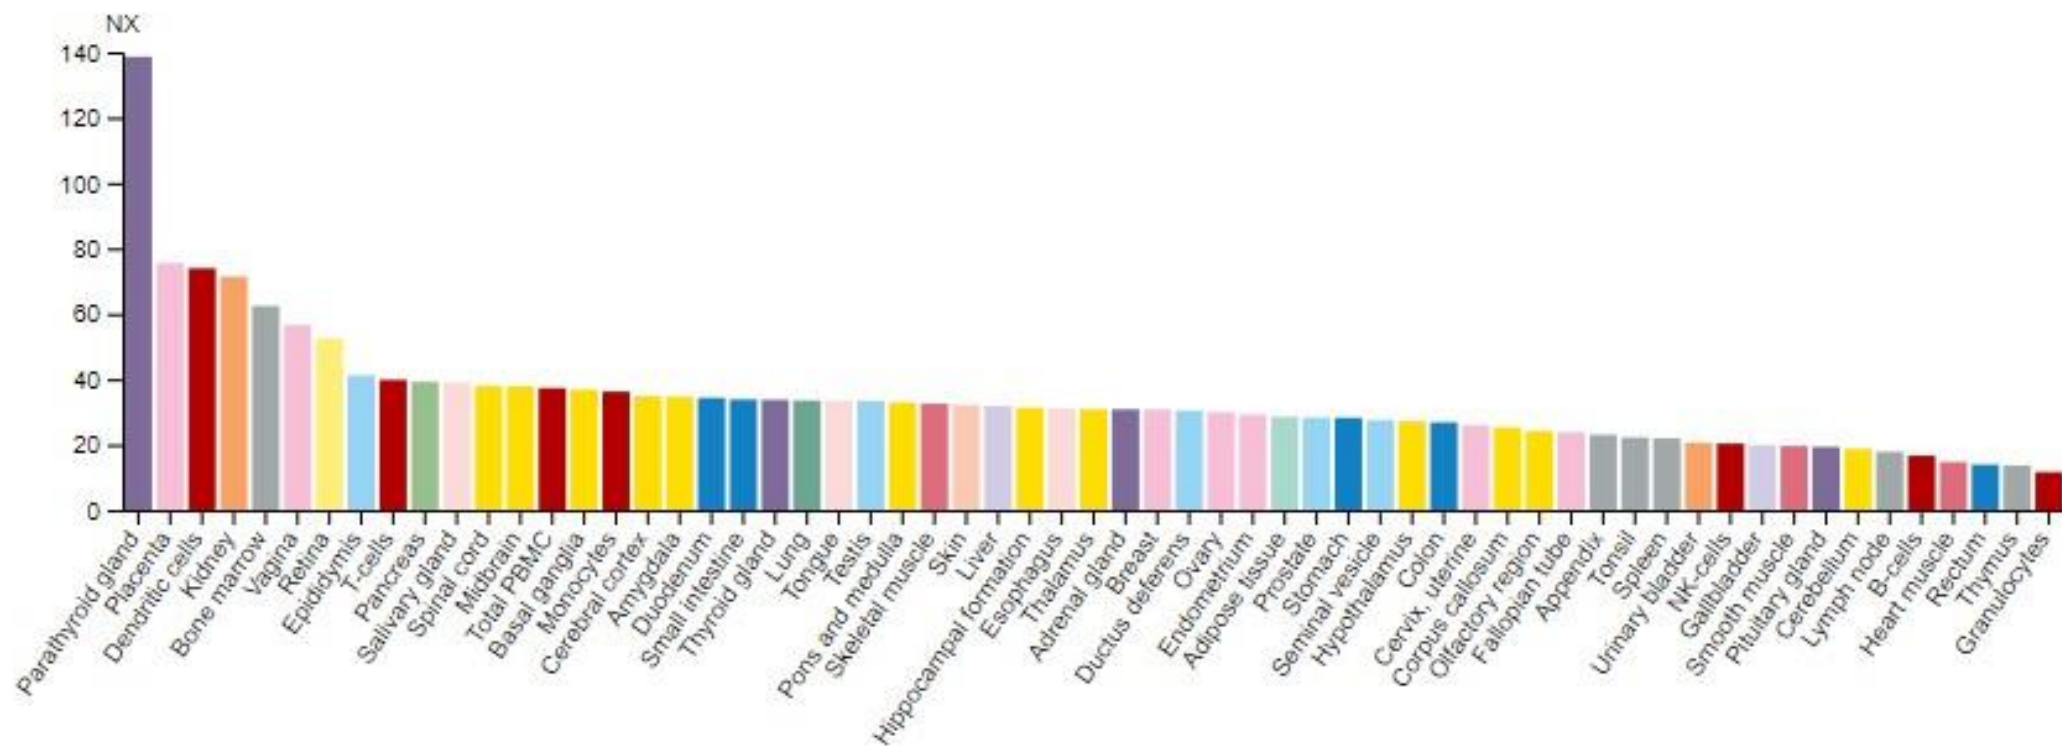

## SLC7A8

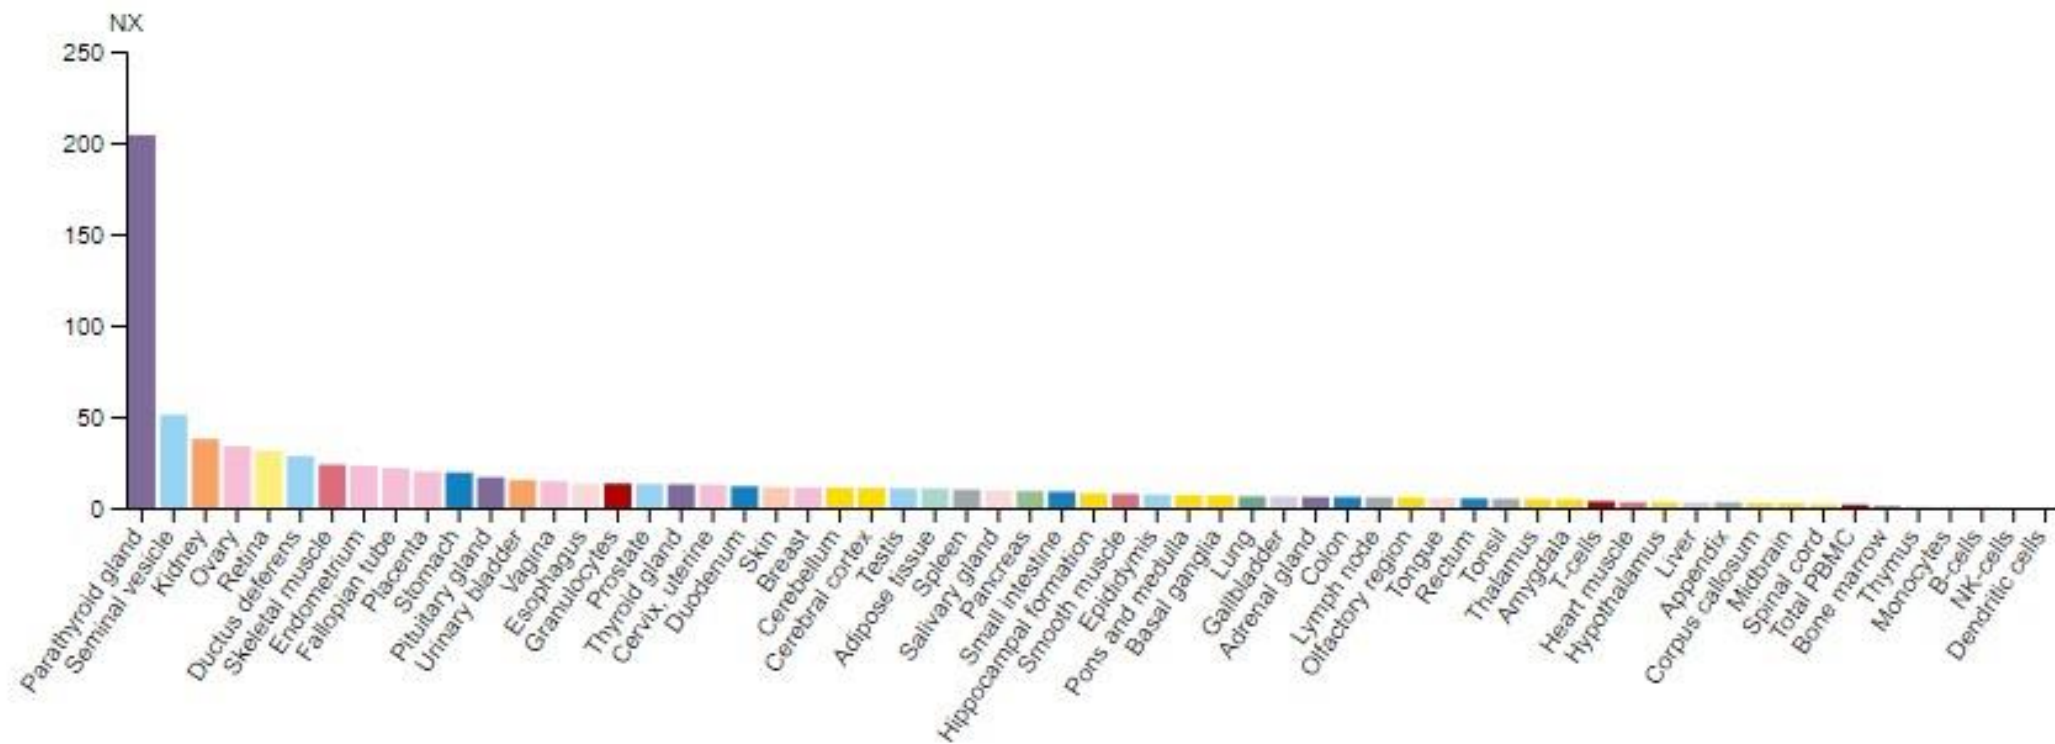

TH

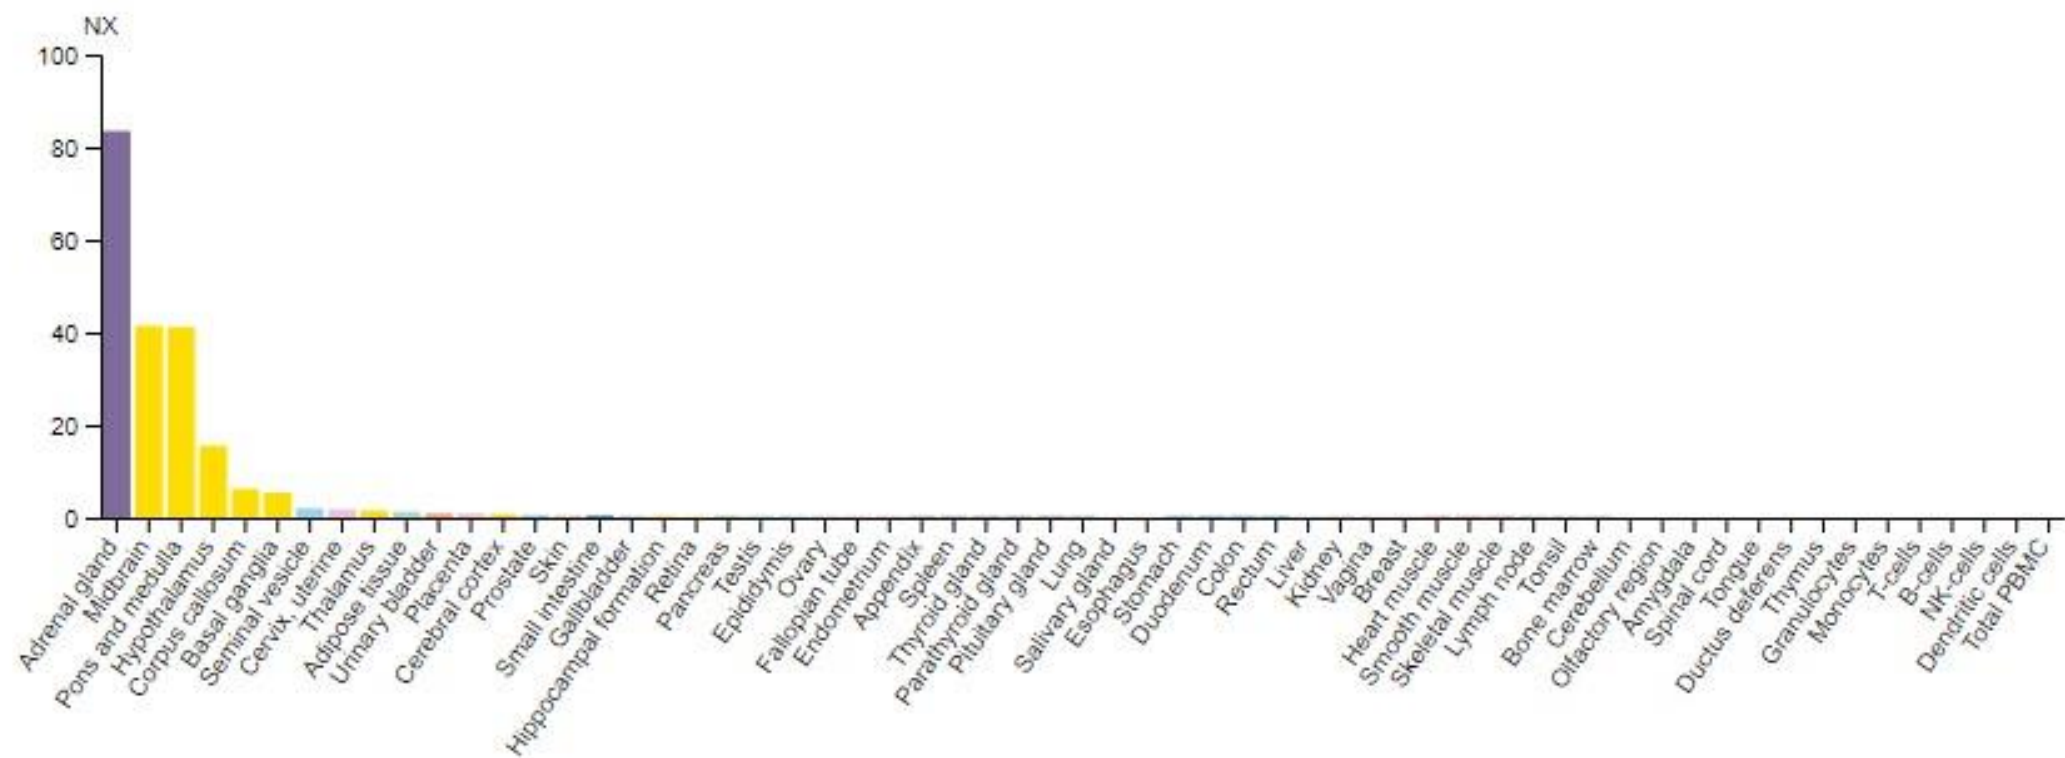

Supplement: Supplementary file 1 [file ijms-22-10440-s001.zip › Supplementary material S1.pdf]
