# Supplementary material for: Molecular Insights into SARS-CoV2-Induced Alterations of the Gut/Brain Axis
Source: Int J Mol Sci. 2021 Sep 28;22(19):10440. doi: 10.3390/ijms221910440 (PMC8508788; doi:10.3390/ijms221910440)
Supplement: Supplementary file 1 [file ijms-22-10440-s001.zip › Table S1.pdf]

**Table S1: List of the top-25 genes that more closely co-express with *ACE2* in SARS-CoV2-infected human enterocytes.** A set of previously published RNA-seq data [34] obtained from the analysis of SARS-CoV2-infected human intestinal organoids was re-assessed in order to identify the top-25 genes that more closely co-express with *ACE2* under these experimental conditions.

| Gene Symbol    | Gene Name                                                                 |
|----------------|---------------------------------------------------------------------------|
| <i>ACSL5</i>   | acyl-CoA synthetase long-chain family member 5                            |
| <i>ALDOB</i>   | aldolase B, fructose-bisphosphate                                         |
| <i>ATP1A1</i>  | ATPase, Na <sup>+</sup> /K <sup>+</sup> transporting, alpha 1 polypeptide |
| <i>BTD</i>     | biotinidase                                                               |
| <i>CENPJ</i>   | centromere protein J                                                      |
| <i>CREB3L3</i> | cAMP responsive element binding protein 3-like 3                          |
| <i>CYP3A4</i>  | cytochrome P450, family 3, subfamily A, polypeptide 4                     |
| <i>DMD</i>     | dystrophin                                                                |
| <i>GATM</i>    | glycine amidinotransferase                                                |
| <i>GLRX</i>    | glutaredoxin                                                              |
| <i>GSTM4</i>   | glutathione S-transferase mu 4                                            |
| <i>IGIP</i>    | IgA-inducing protein homolog                                              |
| <i>MAOB</i>    | monoamine oxidase B                                                       |
| <i>MTTP</i>    | microsomal triglyceride transfer protein                                  |
| <i>OAT</i>     | ornithine aminotransferase                                                |
| <i>PCYOX1</i>  | prenylcysteine oxidase 1                                                  |
| <i>PDCD4</i>   | programmed cell death 4                                                   |
| <i>PHGR1</i>   | proline/histidine/glycine-rich 1                                          |
| <i>PLD1</i>    | phospholipase D1                                                          |
| <i>RARRES1</i> | retinoic acid receptor responder                                          |
| <i>RBP2</i>    | retinol binding protein 2                                                 |
| <i>SGK1</i>    | serum/glucocorticoid regulated kinase 1                                   |
| <i>SLC5A1</i>  | solute carrier family 5                                                   |
| <i>TMBIM6</i>  | transmembrane BAX inhibitor motif containing 6                            |
| <i>TTC36</i>   | tetratricopeptide repeat domain 36                                        |
