# Supplementary material for: Molecular Insights into SARS-CoV2-Induced Alterations of the Gut/Brain Axis
Source: Int J Mol Sci. 2021 Sep 28;22(19):10440. doi: 10.3390/ijms221910440 (PMC8508788; doi:10.3390/ijms221910440)
Supplement: Supplementary file 1 [file ijms-22-10440-s001.zip › Table S2.pdf]

**Table S2: Enrichment analysis of the ACE2 co-expression network.** An enrichment analysis was performed on the list of top-25 genes that more closely co-express with ACE2 in SARS-CoV2-infected human enterocytes. To this aim we used the Enrichr platform of enrichment analyses (<https://maayanlab.cloud/Enrichr/>) and queried the BioPlanet library of pathways (created and run by the National Institute of Health, USA) [37], which compiles and integrates libraries of pathways from a large range of sources. The top-10 most significantly enriched pathways, the corresponding adjusted p-values and genes annotated with each pathway are shown below.

| Pathway                                   | Adjusted P-value | Genes                                                                      |
|-------------------------------------------|------------------|----------------------------------------------------------------------------|
| Metabolism                                | 1.78E-4          | <i>GSTM4, GATM, OAT, BTD, MAOB, MTPP, ACSL5, GLRX, ALDOB, CYP3A4, PLD1</i> |
| Arginine and proline metabolism           | 0.002            | <i>GATM, OAT, MAOB</i>                                                     |
| Drug metabolism: cytochrome P450          | 0.006            | <i>GSTM4, MAOB, CYP3A4</i>                                                 |
| Urea cycle and metabolism of amino groups | 0.008            | <i>GATM, OAT</i>                                                           |
| mTOR signaling pathway                    | 0.009            | <i>PDCD4, PLD1, SGK1</i>                                                   |
| Biological oxidations                     | 0.011            | <i>GSTM4, MAOB, CYP3A4</i>                                                 |
| Glycine, serine and threonine metabolism  | 0.011            | <i>GATM, MAOB</i>                                                          |
| Alpha-synuclein signaling                 | 0.011            | <i>MAOB, PLD1</i>                                                          |
| Aldosterone-regulated sodium reabsorption | 0.017            | <i>ATP1A1, SGK1</i>                                                        |
| Tryptophan metabolism                     | 0.029            | <i>MAOB, CYP3A4</i>                                                        |
