# Supplementary material for: Molecular Insights into SARS-CoV2-Induced Alterations of the Gut/Brain Axis
Source: Int J Mol Sci. 2021 Sep 28;22(19):10440. doi: 10.3390/ijms221910440 (PMC8508788; doi:10.3390/ijms221910440)
Supplement: Supplementary file 1 [file ijms-22-10440-s001.zip › Table S3.pdf]

**Table S3:** Extracted results showing statistically significant fold changes in blood levels of relevant metabolites in comparisons of non severe COVID-19 patients vs healthy subjects (1<sup>st</sup> table) and severe COVID-19 patients vs healthy subjects (2<sup>nd</sup> table) [72].

| <b>Non Severe COVID-19 vs Healthy subjects</b> |                    |                         |
|------------------------------------------------|--------------------|-------------------------|
| <b>Metabolites</b>                             | <b>Fold change</b> | <b>Adjusted p-value</b> |
| asparagine                                     | -0,675798          | 7,5216E-07              |
| glutamine                                      | -0,294186          | 0,000990825             |
| glycine                                        | -0,571081          | 8,06036E-06             |
| isoleucine                                     | -0,613711          | 1,11056E-05             |
| leucine                                        | -0,510385          | 5,67243E-06             |
| methionine                                     | -0,713963          | 3,19159E-08             |
| proline                                        | -0,870753          | 6,94713E-08             |
| serine                                         | -0,435634          | 0,000117601             |
| threonine                                      | -0,80806           | 5,31282E-07             |
| tryptophan                                     | -0,639467          | 2,40902E-07             |
| tyrosine                                       | -0,323365          | 0,034459511             |
| valine                                         | -0,550451          | 1,69336E-07             |
| dopamine 3-O-sulfate                           | -0,998589          | 0,001989449             |
| <b>Severe COVID-19 vs Healthy subjects</b>     |                    |                         |
| glutamine                                      | -0,316643          | 0,014151896             |
| glycine                                        | -0,580321          | 0,000207618             |
| isoleucine                                     | -0,79801           | 1,90408E-05             |
| leucine                                        | -0,533004          | 0,000523773             |
| methionine                                     | -0,583045          | 0,000290771             |
| proline                                        | -0,923271          | 2,51193E-07             |
| serine                                         | -0,409389          | 0,002062248             |
| threonine                                      | -0,785386          | 3,41246E-05             |
| tryptophan                                     | -0,567395          | 0,000284531             |
| valine                                         | -0,548777          | 0,000206703             |
